# Supplementary material for: Emissive CdTe/ZnO/GO quasi-core–shell–shell hybrid quantum dots for white light emitting diodes
Source: Royal Society of Chemistry journal article supplement (doi:10.1039/c6nr06314d), 2016-01-01
Supplement: c6nr06314d1.pdf [file c6nr06314d1.pdf]

## Supplementary Information

### **Emissive CdTe-ZnO-GO Quasi-Core-Shell-Shell Hybrid Quantum Dots for White Light Emitting Diodes**

Hong Hee Kim,<sup>†a,b</sup> Joon-Suh Park,<sup>c</sup> Il Ki Han,<sup>c</sup> Sung Ok Won,<sup>d</sup> Cheolmin Park,<sup>a</sup> Do Kyung Hwang,<sup>\*e,f</sup> and Won Kook Choi,<sup>\*a,f</sup>

<sup>a</sup>Materials and Life Science Research Division, Korea Institute of Science and Technology (KIST), Seoul 02792, Korea. E-mail: wkchoi@kist.re.kr; Fax: +82-2-958-6720; Tel: +82-2-958-5562

<sup>b</sup>Department of Materials Science and Engineering, Yonsei University, Seoul 03722, Korea.

<sup>c</sup>Nanophotonics Research Center, Korea Institute of Science and Technology (KIST), Seoul 02792, Korea.

<sup>d</sup>Advanced Analysis Center, Korea Institute of Science and Technology (KIST), Seoul 02792, Korea.

<sup>e</sup>Center for Opto-Electronic Materials and Devices, Post-Silicon Semiconductor Institute, Korea Institute of Science and Technology (KIST), Seoul 02792, Korea. E-mail: youngjei@kist.re.kr and dkhwang@kist.re.kr; Fax: +82-2-958-6720; Tel: +82-2-958-5414

<sup>f</sup>Department of Nanomaterials and Nano Science, Korea University of Science and Technology (KUST), Daejeon 34113, Korea.

## **Contents**

1. HRTEM image of CdTe-TGA and CdTe/ZnO QDs. (Fig. S1)
2. PL spectra of CdTe-TGA, CdTe/ZnO and CdTe/ZnO/GO QDs, respectively. (Fig. S2)
3. TRPL decay times of CdTe-TGA, CdTe/ZnO, and CdTe/ZnO/GO QDs. (Table S1)
4. PL and EL transition mechanisms for CdTe/ZnO/GO QDs. (Table S2)
5. Summary of performance parameters of WQDLED. (Table S3)

(a)

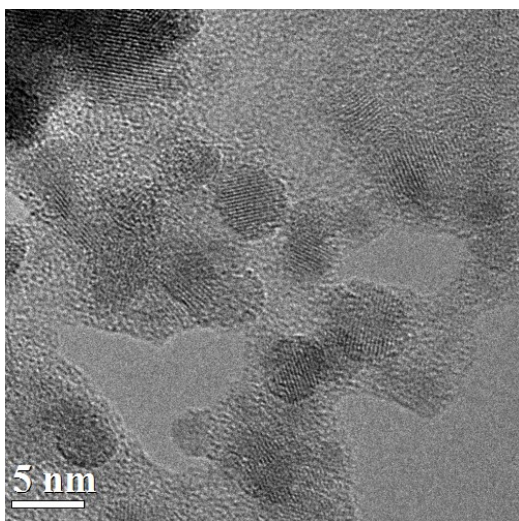

(b)

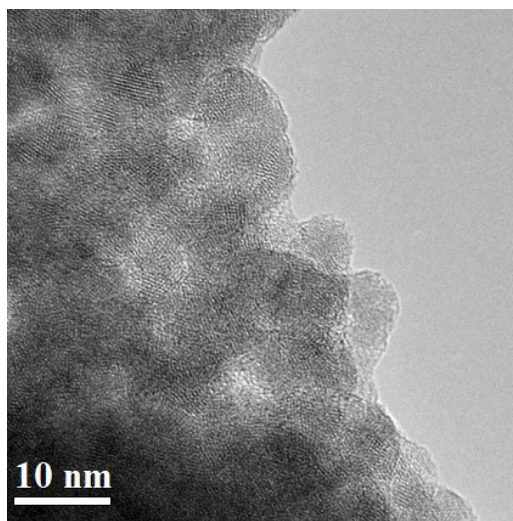

**Figure S1.** HRTEM image of (a) CdTe-TGA and (b) CdTe/ZnO QDs.

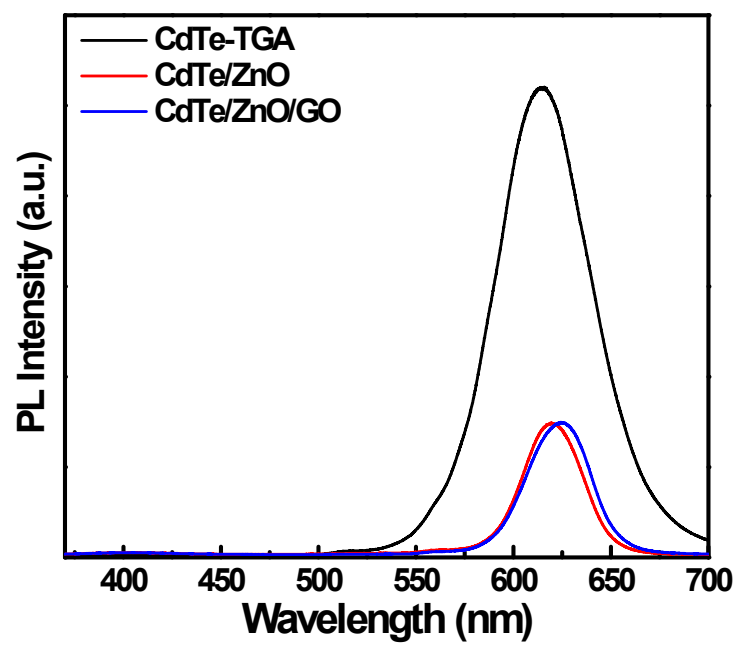

**Figure S2.** Photoluminescence spectra of CdTe-TGA, CdTe/ZnO and CdTe/ZnO/GO QDs, respectively.

**Table S1.** TRPL decay times of CdTe-TGA, CdTe/ZnO, and CdTe/ZnO/GO QDs.

| Sample      | Detect Wavelength (nm) | Decay Time (ns) $\tau_1$ | Decay Time (ns) $\tau_2$ | Normalized Fit function                         |
|-------------|------------------------|--------------------------|--------------------------|-------------------------------------------------|
| CdTe-TGA    | 615 nm                 | 3.054                    | 18.087                   | $0.620e^{-\tau/\tau_1} + 0.380e^{-\tau/\tau_2}$ |
| CdTe/ZnO    | 620 nm                 | 2.646                    | 12.760                   | $0.708e^{-\tau/\tau_1} + 0.292e^{-\tau/\tau_2}$ |
| CdTe/ZnO/GO | 625 nm                 | 2.149                    | 10.851                   | $0.725e^{-\tau/\tau_1} + 0.275e^{-\tau/\tau_2}$ |

**Table S2.** Photoluminescence and electroluminescence transition mechanisms for CdTe/ZnO/GO QDs.

| Transition                              | Photoluminescence | Electroluminescence |
|-----------------------------------------|-------------------|---------------------|
| $CB_{ZnO} \rightarrow VB_{ZnO}$         | 382 nm (3.24 eV)  | X                   |
| Defect band $\rightarrow VB_{ZnO}$      | 404 nm (3.05 eV)  | X                   |
| $(LUMO^{+2})_{GO} \rightarrow VB_{ZnO}$ | 422 nm (2.93 eV)  | 425 nm (2.92 eV)    |
| $LUMO_{GO} \rightarrow VB_{ZnO}$        | 440 nm (2.82 eV)  | 465 nm (2.67 eV)    |
| $ZnO(V_O) \rightarrow VB_{ZnO}$         | X.                | 517 nm (2.39 eV)    |
| $CB_{CdTe} \rightarrow VB_{CdTe}$       | 624 nm (1.98 eV)  | 620 nm (2.00 eV)    |

**Table S3.** Performance parameters obtained from CdTe/ZnO/GO based WQDLED.

| $V_{on}$ (V) | Max. EQE (%) | Max. Luminance (Cd/m <sup>2</sup> ) | CIE index (x,y) |
|--------------|--------------|-------------------------------------|-----------------|
| 8            | 0.08         | 480                                 | (0.35, 0.28)    |

( $V_{on}$  is the applied voltage when the luminance is detected with PR 670)
